# Supplementary material for: Small Protein-Mediated Quorum Sensing in a Gram-Negative Bacterium
Source: PLOS journal article supplement (doi:10.1371/journal.pone.0029192), 2011-12-12
Supplement: S14 (10.1371/journal.pone.0029192.s014) [file journal.pone.0029192.s014]

**Table S1.** Density-dependent expression of *rax* genes is controlled by Ax21

|  |  | Fold change at early log (106 cfu/ml)/late log (108 cfu/ml) | |
| --- | --- | --- | --- |
| Locus ID | Common Name | PXO99 | PXO∆*ax21* |
| PXO_02134 | *raxP* | -1.76a | NCb |
| PXO_02621 | *raxC* | -1.79 | NC |
| PXO_04469 | *raxR* | -1.78 | NC |
| PXO_04477 | *raxB* | -1.77 | NC |
| PXO_04478 | *raxA* | -1.8 | NC |
| PXO_04479 | *raxST* | -1.76 | NC |

a, - indicates that the level of expression at early log is lower than late log

b, NC (No changes) indicates the gene expression level does not change significantly in array analysis (log2ratio>,<0.8 and %FDR<5)
