# Supplementary material for: Small Protein-Mediated Quorum Sensing in a Gram-Negative Bacterium
Source: PLOS journal article supplement (doi:10.1371/journal.pone.0029192), 2011-12-12
Supplement: S15 (10.1371/journal.pone.0029192.s015) [file journal.pone.0029192.s015]

**Table S2.** Genes up-regulated in early log phase by Ax21

|  |  |  | **Fold up-regulated** | | |
| --- | --- | --- | --- | --- | --- |
| **Locus ID** | **Common name** | **COG ID** | **Early log** | **Mid log** | **Late log** |
| PXO_00026 | MotA | COG1291N | 2.20 |  |  |
| PXO_00027 | OmpA | COG1360N | 3.14 |  |  |
| PXO_00389 | superoxide dismutase (SodM) | COG0605P | 3.29 |  | 2.71 |
| PXO_00451 | polar amino acid transporter | COG4535P | 1.80 |  |  |
| PXO_00958 | flagellar biosynthesis switch protein (FleN) | COG0455D | 1.89 |  |  |
| PXO_01000 | flagellar protein | COG1345N | 4.76 |  | 1.77 |
| PXO_01016 | flagellar protein (FlgM) |  | 4.19 |  | 1.82 |
| PXO_01017 | conserved hypothetical protein |  | 2.82 |  |  |
| PXO_01138 | protein U (Pru) | COG5430S | 1.76 |  |  |
| PXO_01391 | exopolysaccharide xanthan biosynthesis (GumB) | COG1596M | 2.79 |  |  |
| PXO_01395 | exopolysaccharide xanthan biosynthesis (GumE) |  | 1.96 |  |  |
| PXO_01400 | exopolysaccharide xanthan biosynthesis (GumJ) | COG2244R | 1.76 |  |  |
| PXO_01602 | PilG | COG0745TK | 1.76 |  |  |
| PXO_01659 | conserved hypothetical protein |  | 2.46 |  |  |
| PXO_02431 | cellulase S |  | 2.79 |  | 1.76 |
| PXO_02830 | catalase | COG0753P | 2.00 |  |  |
| PXO_02851 | conserved hypothetical protein | COG5510S | 2.78 |  | 1.76 |
| PXO_02852 | entericidin family (EcnA/B) |  | 4.02 |  | 2.55 |
| PXO_02931 | conserved hypothetical protein |  | 2.04 |  |  |
| PXO_03037 | conserved hypothetical protein |  | 1.99 |  |  |
| PXO_03185 | DNA-binding protein | COG2916R | 1.82 |  |  |
| PXO_03604 | conserved hypothetical protein | COG5481S | 1.81 |  |  |
| PXO_03892 | DNA-binding protein |  | 1.80 |  |  |
| PXO_04410 | lipoprotein, putative |  | 2.40 |  |  |
| PXO_04458 | conserved hypothetical protein |  | 2.46 |  |  |
| PXO_04714 | lipoprotein, putative | COG1262S | 3.00 |  | 2.45 |
| PXO_06137 | ClpS | COG2127S | 1.76 |  |  |
| PXO_06165 | flagellar protein | COG1344N | 3.31 |  |  |
