# Supplementary material for: Small Protein-Mediated Quorum Sensing in a Gram-Negative Bacterium
Source: PLOS journal article supplement (doi:10.1371/journal.pone.0029192), 2011-12-12
Supplement: S18 (10.1371/journal.pone.0029192.s018) [file journal.pone.0029192.s018]

**Table S5.** Genes down-regulated in early log phase by Ax21

|  |  |  | **Fold down-regulated** | | |
| --- | --- | --- | --- | --- | --- |
| **Locus ID** | **Common name** | **COG ID** | **Early log** | **Mid log** | **Late log** |
| PXO_00063 | SpoVT / AbrB like domain protein | COG2002K | 2.37 |  |  |
| PXO_00096 | conserved hypothetical protein |  | 3.07 |  |  |
| PXO_00150 | LexA repressor | COG1974KT | 4.59 |  |  |
| PXO_00277 | ISXo2 putative transposase |  | 3.35 | 2.62 |  |
| PXO_00416 | virulence protein | COG3946U | 2.08 |  |  |
| PXO_00437 | stringent starvation protein B | COG2969R | 2.68 |  | 1.80 |
| PXO_00461 | transport protein | COG1566V | 2.74 |  | 2.47 |
| PXO_00480 | transcriptional regulator TetR/acrR family | COG1309K | 1.87 |  | 1.77 |
| PXO_00658 | glutathione peroxidase | COG0386O | 3.93 | 1.93 | 2.51 |
| PXO_00663 | conserved hypothetical protein |  | 3.44 | 2.91 | 2.93 |
| PXO_00678 | putative signal protein with GAF, GGDEF and EAL domains | COG2200T | 2.19 |  | 2.00 |
| PXO_00703 | serine protease | COG4625S | 3.71 |  |  |
| PXO_00735 | IDI2 | COG0182J | 1.80 |  |  |
| PXO_01082 | transcriptional regulator, LysR family | COG0583K | 2.09 |  |  |
| PXO_01139 | methionine aminopeptidase, type I | COG0024J | 2.72 |  |  |
| PXO_01154 | transcriptional regulator MarR family | COG1846K | 2.12 | 1.80 |  |
| PXO_01978 | FeS assembly ATPase (SufC) | COG0396O | 2.12 |  | 1.85 |
| PXO_01979 | FeS assembly protein (SufB) | COG0719O | 2.18 |  | 1.76 |
| PXO_02029 | Rhs element Vgr protein | COG3501S | 1.95 |  |  |
| PXO_02045 | EvpA | COG3516S | 1.79 |  |  |
| PXO_02150 | ribosomal protein L19 | COG0335J | 2.15 |  | 1.75 |
| PXO_02316 | endonuclease |  | 2.40 |  |  |
| PXO_02523 | outer membrane protein (OmpA) | COG2885M | 1.78 |  |  |
| PXO_02542 | ISXo8 transposase | COG5659L | 2.14 |  |  |
| PXO_02547 | GTP-binding protein (TypA) | COG1217T | 1.85 |  |  |
| PXO_02733 | TonB-dependent outer membrane receptor | COG4771P | 2.79 |  |  |
| PXO_03230 | DNA helicase II | COG0210L | 1.84 |  |  |
| PXO_03231 | conserved hypothetical protein | COG4529S | 2.14 |  |  |
| PXO_03240 | ribosomal protein L28 (RpmB) | COG0227J | 1.85 |  |  |
| PXO_03272 | ribosomal large subunit pseudouridine synthase E | COG1187J | 2.21 |  |  |
| PXO_03380 | inner membrane protein (YedI) | COG2354S | 2.21 | 2.04 | 1.82 |
| PXO_03464 | ISXoo7 transposase | COG3039L | 1.78 |  |  |
| PXO_03711 | alternative sigma factor (RpoH) | COG0568K | 2.17 | 2.09 | 1.88 |
| PXO_03786 | purine catabolism protein (PucG) | COG0075E | 1.79 |  |  |
| PXO_04041 | conserved hypothetical protein |  | 1.93 |  |  |
| PXO_04320 | transcriptional regulator GntR family | COG2188K | 2.57 | 1.85 |  |
| PXO_04531 | ribosomal protein L7/L12 | COG0222J | 1.97 |  |  |
| PXO_04532 | ribosomal protein L10, putative | COG0244J | 1.88 |  | 1.79 |
| PXO_04533 | ribosomal protein L1 | COG0081J | 1.81 |  |  |
| PXO_04542 | ribose-phosphate pyrophosphokinase | COG0462FE | 1.95 |  |  |
| PXO_05533 | ribosomal protein L21 | COG0261J | 1.77 |  |  |
| PXO_05534 | ribosomal protein L27 | COG0211J | 2.14 |  | 1.93 |
| PXO_05583 | phosphate ABC transporter, phosphate-binding protein (PstS) | COG0226P | 2.22 |  | 1.98 |
