# Supplementary material for: Small Protein-Mediated Quorum Sensing in a Gram-Negative Bacterium
Source: PLOS journal article supplement (doi:10.1371/journal.pone.0029192), 2011-12-12
Supplement: S21 (10.1371/journal.pone.0029192.s021) [file journal.pone.0029192.s021]

**Table S8. List of primers used for quantitative realtime PCR.**

| **Locus ID** | **Primer sequences** |
| --- | --- |
| PXO_04477 *raxB* | Fw 5' agttgggctttcaatggatg  RV 5' gaccaacgtctgggtgaatc |
| PXO_04479 *raxST* | Fw 5' gcggtattcgacgcctact  RV 5' ctcgaagctatcgacgatcc |
| PXO_04469 *raxR* | Fw 5' ccctgatccttgactggatg  RV 5' gcaaagggtttggtcaggta |
| PXO_00068 | Fw 5' aatgagtcggcaaaacaagg  RV 5' acatcacccgctatcagacc |
| PXO_00666 | Fw 5' cgatacgacaacccttcgat  RV 5' ccgcagaaggagaacaggt |
| PXO_00678 | Fw 5' gccttccagctgggtaatc  RV 5' cgccattcattcgcttctat |
| PXO_00711 | Fw 5' attgccaatcacaagcaaca  RV 5' ggcgttattaagcgtggaat |
| PXO_00929 | Fw 5' gacagatgccgagcacatc  RV 5' caggatgtctacgtgctgga |
| PXO_00964 | Fw 5' ctagcgctctggttgacctc  RV 5' cgaacagcagtgggtcatag |
| PXO_02364 | Fw 5' ctgacgatcacggaacttga  RV 5' gatcctgcacgacaccatc |
| PXO_02637 | Fw 5' aaacggcttggtgatgtagg  RV 5' ctaacctcaacgggttccag |
| PXO_03711 | Fw 5' cctgatccaggaaggcaata  RV 5' acgatgcgccagttcttc |
| PXO_03945 | Fw 5' cgaagaaatggacgtcatgc  RV 5' tgaaatattttcgccgacca |
| 16sRNA | Fw 5' ctggaaagttccgtggatgt  RV 5' tggtagtccacgccctaaac |
