# Supplementary material for: Small Protein-Mediated Quorum Sensing in a Gram-Negative Bacterium
Source: PLOS journal article supplement (doi:10.1371/journal.pone.0029192), 2011-12-12
Supplement: S22 (10.1371/journal.pone.0029192.s022) [file journal.pone.0029192.s022]

**Table S9. Expression profile of *Xoo* genes that were selected to generate knockout strains for functional analysis.**

| **Locus ID** | **Common name** | **Phenotypes$** | | | **PXO99/PXO99*∆ax21*** | | | **Early log/Late log** | |
| --- | --- | --- | --- | --- | --- | --- | --- | --- | --- |
| **Motility** | **Virulence** | **Biofilm** | **Early log** | **Mid log** | **Late log** | **PXO99** | **PXO99*∆ax21*** |
| PXO_00678 | GAF, GGDEF and EAL domains | + |  | + | -2.19 |  | -2.00 |  |  |
| PXO_01016 | FlgM | + |  |  | 4.19 |  | 1.82 |  |  |
| PXO_01021 | PAS(PAC), GGDEF and EAL domains | + |  |  |  |  |  | 4.69 |  |
| PXO_01391 | GumB | ++ | ++ |  | 2.79 |  |  |  |  |
| PXO_01395 | GumE | ++ | ++ | + | 1.96 |  |  |  |  |
| PXO_01602 | PilG |  |  |  | 1.76 |  |  |  |  |
| PXO_02637 | PilH | + |  | + |  |  | 1.80 |  |  |
| PXO_02671 | XadA | + | + | + |  | -2.48 |  |  |  |
| PXO_02991 | Filamentous hemagglutinin | + |  |  |  |  |  | -1.93 |  |
| PXO_04326 | PgaC | + |  |  |  |  |  | -2.27 |  |
| PXO_04882 | PilB | + | + | + |  | 1.95 |  |  |  |
| PXO_06202 | GGDEF and EAL domains | + | + | + |  |  |  | 2.84 |  |
