# Supplementary material for: Small Protein-Mediated Quorum Sensing in a Gram-Negative Bacterium
Source: PLOS journal article supplement (doi:10.1371/journal.pone.0029192), 2011-12-12
Supplement: S23 (10.1371/journal.pone.0029192.s023) [file journal.pone.0029192.s023]

**Table S10. List of primers used to generate *Xoo* knockout strains.**

| **Strains** | **Primer sequences** |
| --- | --- |
| PXO99*∆00678* | Fw 5' gacacgttcaaggccagatt  RV 5' cacagtatcggcaccttgtg |
| PXO99*∆01016* | Fw 5' cagcgcccagttcacttc  RV 5' agcgcgtctcggtagagaat |
| PXO99*∆01021* | Fw 5' GGTGCGTATGCCGAAGTATT  RV 5' GCAGACCGTTGATTTCCAGT |
| PXO99*∆01391* | Fw 5' ggacgattgtcggaattcat  RV 5' aactgatcggacgattttgc |
| PXO99*∆01395* | Fw 5' ccttccttactgggcatcaa  RV 5' tgatcacctacgctgtcgag |
| PXO99*∆01602* | Fw 5' gatgtagtcgctggcacctt  RV 5' gatggtaacttgccgatggt |
| PXO99*∆02637* | Fw 5' cgtctggccgatgtacctat  RV 5' cacactaggggaaacacatgg |
| PXO99*∆02671* | Fw 5' ctgcagccaatgcgtttt  RV 5' cagaacagcgcagccttc |
| PXO99*∆02991* | Fw 5' gctggaaaaccctgcactt  RV 5' agagccagagccagaccac |
| PXO99*∆04326* | Fw 5' ctccgtttcaggcttggtc  RV 5' cggagtaccttatctgcatcg |
| PXO99*∆04882* | Fw 5' tgccactgatggatgtgtct  RV 5' gttctgctgcacctggttg |
| PXO99*∆06202* | Fw 5' ctagcgctctggttgacctc  RV 5' cgaaaaagctgtagcggttg |
