# Supplementary material for: Small Protein-Mediated Quorum Sensing in a Gram-Negative Bacterium
Source: PLOS journal article supplement (doi:10.1371/journal.pone.0029192), 2011-12-12
Supplement: S24 (10.1371/journal.pone.0029192.s024) [file journal.pone.0029192.s024]

**Table S11.** Bacterial strains and plasmids used in this study.

| **Strain or plasmid** | **Relevant characteristic** | **Source or references** |
| --- | --- | --- |
| *Xanthomonas oryzae* pv. *oryzae* | | |
| PXO99 | Phillipines race 6 (PR6) strain, CpR | [2] |
| PXO99*∆ax21* | PXO99 *PXO_03968::Km*, Ax21-, KmR | [3] |
| PXO99*∆00678* | PXO99 *PXO_00678::Km*, KmR | This study |
| PXO99*∆01016* | PXO99 *PXO_01016::Km*, KmR | This study |
| PXO99*∆01021* | PXO99 *PXO_01021::Km*, KmR | This study |
| PXO99*∆01391* | PXO99 *PXO_01391::Km*, KmR | This study |
| PXO99*∆01395* | PXO99 *PXO_01395::Km*, KmR | This study |
| PXO99*∆01602* | PXO99 *PXO_01602::Km*, KmR | This study |
| PXO99*∆02637* | PXO99 *PXO_02637::Km*, KmR | This study |
| PXO99*∆02671* | PXO99 *PXO_02671::Km*, KmR | This study |
| PXO99*∆02991* | PXO99 *PXO_02991::Km*, KmR | This study |
| PXO99*∆04326* | PXO99 *PXO_04326::Km*, KmR | This study |
| PXO99*∆04882* | PXO99 *PXO_04882::Km*, KmR | This study |
| PXO99*∆06202* | PXO99 *PXO_06202::Km*, KmR | This study |
| PXO99*∆ax21*(rAx21) | PXO99*∆ax21* complement with pML122- rAx21, KmR, GmR | This study |
| PXO99*∆raxST*(rAx21) | PXO99*∆raxST* carrying pML122- rAx21, KmR, GmR | This study |
| *Escherichia coli* | | |
| TOP10 | F- *mcr*A Δ(*mrr*-*hsd*RMS-*mcr*BC φ80*lac*ZΔM15 Δ*lac*Χ74 *rec*A1 *ara*D139 Δ(*ara*-*leu*) 7697 *gal*U *gal*K *rps*L (StrR) *end*A1 *nup*G λ- | Invitrogen |
| Plasmid | | |
| pGEM®-T | pGEM®-5Zf(+) ori, ApR | Promega |
| pML122 | RSF1010-derived broad-host-range expression vector, GmR | [27] |
| pGEM®-His-*ax21* | pGEM-T carrying a fragment containing PXO_*00678* ORF with C-terminal 6XHis tag, ApR | This study |
| pGEM®-T*00678* | pGEM-T carrying a fragment containing part of the PXO_*00678* ORF, disrupted by a KmR cassett, KmR, ApR | This study |
| pGEM®-T*01016* | pGEM-T carrying a fragment containing part of the PXO_*01016* ORF, disrupted by a KmR cassett, KmR, ApR | This study |
| pGEM®-T*01021* | pGEM-T carrying a fragment containing part of the PXO_*01021* ORF, disrupted by a KmR cassett, KmR, ApR | This study |
| pGEM®-T*01391* | pGEM-T carrying a fragment containing part of the PXO_*01391* ORF, disrupted by a KmR cassett, KmR, ApR | This study |
| pGEM®-T*01395* | pGEM-T carrying a fragment containing part of the PXO_*01395* ORF, disrupted by a KmR cassett, KmR, ApR | This study |
| pGEM®-T*01602* | pGEM-T carrying a fragment containing part of the PXO_*01602*ORF, disrupted by a KmR cassett, KmR, ApR | This study |
| pGEM®-T*02637* | pGEM-T carrying a fragment containing part of the PXO_*02637*ORF, disrupted by a KmR cassett, KmR, ApR | This study |
| pGEM®-T*02671* | pGEM-T carrying a fragment containing part of the PXO_*02671* ORF, disrupted by a KmR cassett, KmR, ApR | This study |
| pGEM®-T*02991* | pGEM-T carrying a fragment containing part of the PXO_*02991* ORF, disrupted by a KmR cassett, KmR, ApR | This study |
| pGEM®-T*04326* | pGEM-T carrying a fragment containing part of the PXO_0*4326* ORF, disrupted by a KmR cassett, KmR, ApR | This study |
| pGEM®-T*04882* | pGEM-T carrying a fragment containing part of the PXO_*04882* ORF, disrupted by a KmR cassett, KmR, ApR | This study |
| pGEM®-T*06202* | pGEM-T carrying a fragment containing part of the PXO_*06202* ORF, disrupted by a KmR cassett, KmR, ApR | This study |
| pML122-rAx21 | pML122 carrying a *SalI* fragment from pGEM®-His-*ax21* for expression of 6x His-tagged Ax21 in *Xoo*, GmR | This study |
